# Supplementary material for: Effects of Increasing Metformin Dose vs Adding/Switching to Dipeptidyl Peptidase-4 Inhibitors on Glycemic Control in Patients with Type 2 Diabetes
Source: PubMed Central journal article supplement — Diabetes Ther. 2021 Feb 17;12(3):897–911. doi: 10.1007/s13300-021-01017-x (PMC7947126; doi:10.1007/s13300-021-01017-x), 2021-02-17
Supplement: 13300_2021_1017_MOESM1_ESM.pdf [file 13300_2021_1017_MOESM1_ESM.pdf]

## Supplementary file

### Effects of increasing metformin dose vs adding/switching to dipeptidyl peptidase-4 inhibitors on glycemic control in patients with type 2 diabetes

Table S1 Results in each outcome for each quintile of propensity score

(A) Laboratory values in primary study group

| PS class | Group                | ΔHbA1c, 12 M (%) |             |             | ΔHbA1c, 3 M (%) |             |             | ΔHbA1c, 6 M (%) |             |             |
|----------|----------------------|------------------|-------------|-------------|-----------------|-------------|-------------|-----------------|-------------|-------------|
|          |                      | Mean             | 95%CI       |             | Mean            | 95%CI       |             | Mean            | 95%CI       |             |
|          |                      |                  | lower limit | upper limit |                 | lower limit | upper limit |                 | lower limit | upper limit |
| 1        | Increased-dose group | -0.89            | -1.40       | -0.38       | -0.91           | -1.53       | -0.28       | -1.11           | -1.79       | -0.43       |
|          | Drug-added group     | -1.11            | -1.54       | -0.67       | -1.24           | -1.63       | -0.85       | -1.33           | -1.83       | -0.83       |
|          | Drug-switched group  | -0.44            | -0.96       | 0.09        | -0.59           | -0.74       | -0.44       | -0.80           | -1.32       | -0.28       |
| 2        | Increased-dose group | -1.08            | -1.52       | -0.64       | -1.12           | -1.48       | -0.76       | -1.14           | -1.54       | -0.74       |
|          | Drug-added group     | -1.13            | -1.53       | -0.72       | -1.05           | -1.38       | -0.72       | -1.06           | -1.41       | -0.71       |
|          | Drug-switched group  | -0.63            | -1.40       | 0.13        | -0.83           | -1.09       | -0.57       | -0.70           | -0.90       | -0.50       |
| 3        | Increased-dose group | -1.00            | -1.37       | -0.63       | -0.81           | -1.08       | -0.54       | -1.11           | -1.46       | -0.76       |
|          | Drug-added group     | -0.98            | -1.32       | -0.64       | -0.99           | -1.32       | -0.67       | -1.11           | -1.50       | -0.72       |
|          | Drug-switched group  | -0.50            | -0.95       | -0.05       | -0.32           | -0.84       | 0.20        | -0.66           | -1.24       | -0.07       |
| 4        | Increased-dose group | -0.99            | -1.19       | -0.78       | -0.80           | -0.99       | -0.61       | -1.04           | -1.27       | -0.81       |
|          | Drug-added group     | -0.91            | -1.35       | -0.47       | -0.88           | -1.35       | -0.41       | -0.94           | -1.55       | -0.32       |
|          | Drug-switched group  | 1.30             | -0.66       | 3.26        |                 |             |             |                 |             |             |
| 5        | Increased-dose group | -0.70            | -1.02       | -0.38       | -0.72           | -0.93       | -0.50       | -0.78           | -1.06       | -0.51       |
|          | Drug-added group     | -1.12            | -1.66       | -0.57       | -1.17           | -1.67       | -0.67       | -0.92           | -1.42       | -0.42       |
|          | Drug-switched group  | 0.50             |             |             | -0.30           |             |             | 0.00            |             |             |

The changes in values at 3 months ( $\pm 1$  months) (3 M), 6 months ( $\pm 1$  months) (6 M), and 12 months ( $\pm 3$  months) (12 M) from baseline are indicated using delta ( $\Delta$ ). CI: confidence intervals, Hb: hemoglobin.

| PS class | Group                | ΔHDL-C (mg/dl) |             |             | ΔLDL-C (mg/dl) |             |             | ΔTotal-C (mg/dl) |             |             | ΔTG (mg/dl) |             |             |
|----------|----------------------|----------------|-------------|-------------|----------------|-------------|-------------|------------------|-------------|-------------|-------------|-------------|-------------|
|          |                      | Mean           | 95%CI       |             | Mean           | 95%CI       |             | Mean             | 95%CI       |             | Mean        | 95%CI       |             |
|          |                      |                | lower limit | upper limit |                | lower limit | upper limit |                  | lower limit | upper limit |             | lower limit | upper limit |
| 1        | Increased-dose group | -2.79          | -10.17      | 4.60        | -8.71          | -25.59      | 8.18        | -16.73           | -34.16      | 0.71        | -24.75      | -67.83      | 18.33       |
|          | Drug-added group     | 1.30           | -1.02       | 3.61        | -6.28          | -13.15      | 0.58        | -11.74           | -19.44      | -4.03       | -7.49       | -34.43      | 19.45       |
|          | Drug-switched group  | 0.00           | -9.02       | 9.02        | -34.80         | -76.96      | 7.36        | -20.67           | -58.26      | 16.93       | 1.86        | -49.14      | 52.86       |
| 2        | Increased-dose group | 0.32           | -1.98       | 2.61        | -6.44          | -22.84      | 9.96        | -7.47            | -25.15      | 10.21       | -34.38      | -86.95      | 18.20       |
|          | Drug-added group     | -1.24          | -3.29       | 0.82        | -15.49         | -26.72      | -4.26       | -16.64           | -31.28      | -2.00       | -19.36      | -48.54      | 9.83        |
|          | Drug-switched group  | 7.20           | 3.39        | 11.01       | -3.10          | -20.82      | 14.62       | -14.00           | -24.06      | -3.94       | -53.50      | -135.67     | 28.67       |
| 3        | Increased-dose group | 0.49           | -1.81       | 2.78        | -9.96          | -22.74      | 2.83        | -16.00           | -29.50      | -2.50       | 4.91        | -25.65      | 35.47       |
|          | Drug-added group     | 0.01           | -2.72       | 2.74        | 4.35           | -5.77       | 14.47       | -1.50            | -13.80      | 10.80       | -25.59      | -51.13      | -0.05       |
|          | Drug-switched group  | 2.28           | -8.20       | 12.77       | -9.20          | -23.86      | 5.46        | -29.00           | -57.69      | -0.31       | -10.40      | -68.81      | 48.01       |
| 4        | Increased-dose group | 1.50           | -0.42       | 3.42        | -5.57          | -11.31      | 0.17        | -14.35           | -27.38      | -1.31       | -13.89      | -34.19      | 6.41        |
|          | Drug-added group     | -0.01          | -3.23       | 3.20        | -12.10         | -28.16      | 3.95        | 2.35             | -24.66      | 29.36       | 59.80       | -139.35     | 258.95      |
|          | Drug-switched group  | -4.50          | -9.40       | 0.40        | 15.50          | 14.52       | 16.48       | 20.00            |             |             | 202.00      | -21.44      | 425.44      |
| 5        | Increased-dose group | 1.51           | -0.56       | 3.58        | -10.01         | -19.56      | -0.46       | -16.26           | -28.42      | -4.09       | -39.69      | -78.00      | -1.37       |
|          | Drug-added group     | 2.05           | -1.30       | 5.40        | -17.09         | -33.70      | -0.47       | -27.94           | -49.96      | -5.92       | -65.27      | -134.00     | 3.46        |
|          | Drug-switched group  | -14.00         |             |             | -90.00         |             |             | 59.00            |             |             | 1672.00     |             |             |

The changes in values at 12 months ( $\pm 3$  months) from baseline are indicated using delta ( $\Delta$ ). CI: confidence intervals, HDL-C: high-density lipoprotein cholesterol, LDL-C: low-density lipoprotein cholesterol, Total-C: total cholesterol, TG: triglyceride.

| PS class | Group                | ΔAST (U/L) |             |             | ΔALT (U/L) |             |             | ΔeGFR (ml/min/1.73m <sup>2</sup> ) |             |             |
|----------|----------------------|------------|-------------|-------------|------------|-------------|-------------|------------------------------------|-------------|-------------|
|          |                      | Mean       | 95%CI       |             | Mean       | 95%CI       |             | Mean                               | 95%CI       |             |
|          |                      |            | lower limit | upper limit |            | lower limit | upper limit |                                    | lower limit | upper limit |
| 1        | Increased-dose group | -8.59      | -22.46      | 5.28        | -7.41      | -16.63      | 1.81        | 0.39                               | -5.55       | 6.33        |
|          | Drug-added group     | -1.58      | -6.23       | 3.06        | -2.55      | -6.28       | 1.19        | -3.87                              | -6.34       | -1.40       |
|          | Drug-switched group  | -5.50      | -16.39      | 5.39        | -10.70     | -20.98      | -0.42       | 1.29                               | -3.56       | 6.15        |
| 2        | Increased-dose group | -7.19      | -14.21      | -0.16       | -6.66      | -13.60      | 0.28        | -1.13                              | -3.53       | 1.26        |
|          | Drug-added group     | -1.67      | -5.44       | 2.10        | -6.55      | -10.71      | -2.38       | -4.38                              | -7.02       | -1.74       |
|          | Drug-switched group  | -3.67      | -12.26      | 4.93        | -7.17      | -19.02      | 4.68        | 6.34                               | -7.70       | 20.38       |
| 3        | Increased-dose group | -1.34      | -4.77       | 2.08        | -0.84      | -5.89       | 4.21        | -1.08                              | -4.68       | 2.52        |
|          | Drug-added group     | -1.78      | -6.22       | 2.66        | -5.39      | -13.17      | 2.39        | 0.58                               | -4.76       | 5.93        |
|          | Drug-switched group  | 0.86       | -2.98       | 4.69        | -2.14      | -6.53       | 2.25        | -1.08                              | -10.33      | 8.18        |
| 4        | Increased-dose group | -2.68      | -7.35       | 1.98        | -4.23      | -10.23      | 1.77        | -0.81                              | -3.54       | 1.92        |
|          | Drug-added group     | -2.85      | -11.77      | 6.07        | -3.09      | -11.73      | 5.54        | -9.21                              | -15.02      | -3.39       |
|          | Drug-switched group  | -4.00      | -11.84      | 3.84        | -6.00      | -13.84      | 1.84        | -24.40                             | -41.26      | -7.54       |
| 5        | Increased-dose group | 0.03       | -3.50       | 3.56        | -2.37      | -10.04      | 5.30        | -2.19                              | -5.21       | 0.83        |
|          | Drug-added group     | -8.16      | -12.92      | -3.40       | -15.32     | -24.69      | -5.95       | -7.54                              | -13.02      | -2.07       |
|          | Drug-switched group  | 74.00      |             |             | 51.00      |             |             | 10.20                              |             |             |

The changes in values at 12 months ( $\pm$  3 months) from baseline are indicated using delta ( $\Delta$ ). AST: aspartate aminotransferase, ALT: alanine aminotransferase, CI: confidence intervals, eGFR: estimated glomerular filtration.

(B) Percentage of patients achieving target HbA1c levels, hospitalization, and incidence rate of hypoglycemia in primary study group

| PS class | Group                | N  | HbA1c <6.5% (%) |             |             | HbA1c <7.0% (%) |             |             | Hospitalization (%) |             |             | Incidence rate of hypoglycemia (%) |             |             |
|----------|----------------------|----|-----------------|-------------|-------------|-----------------|-------------|-------------|---------------------|-------------|-------------|------------------------------------|-------------|-------------|
|          |                      |    | %               | 95%CI       |             | %               | 95%CI       |             | %                   | 95%CI       |             | %                                  | 95%CI       |             |
|          |                      |    |                 | lower limit | upper limit |                 | lower limit | upper limit |                     | lower limit | upper limit |                                    | lower limit | upper limit |
| 1        | Increased-dose group | 17 | 58.82%          | 32.92%      | 81.56%      | 76.47%          | 50.10%      | 93.19%      | 82.35%              | 45.02%      | 138.17%     | 0.00%                              |             | 19.51%      |
|          | Drug-added group     | 70 | 32.86%          | 22.09%      | 45.12%      | 54.29%          | 41.94%      | 66.26%      | 40.00%              | 26.58%      | 57.81%      | 0.00%                              |             | 5.13%       |
|          | Drug-switched group  | 11 | 36.36%          | 10.93%      | 69.21%      | 72.73%          | 39.03%      | 93.98%      | 90.91%              | 43.59%      | 167.19%     | 0.00%                              |             | 28.49%      |
| 2        | Increased-dose group | 34 | 26.47%          | 12.88%      | 44.36%      | 61.76%          | 43.56%      | 77.83%      | 23.53%              | 10.16%      | 46.36%      | 0.00%                              |             | 10.28%      |
|          | Drug-added group     | 59 | 42.37%          | 29.61%      | 55.93%      | 69.49%          | 56.13%      | 80.81%      | 44.07%              | 28.79%      | 64.57%      | 0.00%                              |             | 6.06%       |
|          | Drug-switched group  | 6  | 50.00%          | 11.81%      | 88.19%      | 83.33%          | 35.88%      | 99.58%      | 100.00%             | 36.70%      | 217.66%     | 0.00%                              |             | 45.93%      |
| 3        | Increased-dose group | 40 | 37.50%          | 22.73%      | 54.20%      | 70.00%          | 53.47%      | 83.44%      | 20.00%              | 8.63%       | 39.41%      | 0.00%                              |             | 8.81%       |
|          | Drug-added group     | 51 | 29.41%          | 17.49%      | 43.83%      | 60.78%          | 46.11%      | 74.16%      | 15.69%              | 6.77%       | 30.91%      | 0.00%                              |             | 6.98%       |
|          | Drug-switched group  | 8  | 12.50%          | 0.32%       | 52.65%      | 37.50%          | 8.52%       | 75.51%      | 12.50%              | 0.32%       | 69.65%      | 0.00%                              |             | 36.94%      |
| 4        | Increased-dose group | 63 | 26.98%          | 16.57%      | 39.65%      | 60.32%          | 47.20%      | 72.43%      | 7.94%               | 2.58%       | 18.52%      | 0.00%                              |             | 5.69%       |
|          | Drug-added group     | 34 | 35.29%          | 19.75%      | 53.51%      | 58.82%          | 40.70%      | 75.35%      | 35.29%              | 18.24%      | 61.65%      | 0.00%                              |             | 10.28%      |
|          | Drug-switched group  | 2  | 0.00%           |             | 84.19%      | 0.00%           |             | 84.19%      | 0.00%               |             | 184.44%     | 0.00%                              |             | 84.19%      |
| 5        | Increased-dose group | 72 | 33.33%          | 22.66%      | 45.43%      | 59.72%          | 47.50%      | 71.12%      | 11.11%              | 4.80%       | 21.89%      | 0.00%                              |             | 4.99%       |
|          | Drug-added group     | 26 | 46.15%          | 26.59%      | 66.63%      | 73.08%          | 52.21%      | 88.43%      | 23.08%              | 8.47%       | 50.23%      | 0.00%                              |             | 13.23%      |
|          | Drug-switched group  | 1  | 0.00%           |             | 97.50%      | 0.00%           |             | 97.50%      | 0.00%               |             | 368.89%     | 0.00%                              |             | 97.50%      |

CI: confidence intervals. Color indicates the relative order in the column as the following sequence: red is the highest; green is the lowest; and intermediate color is the in-between with the ranking corresponding to gradational change of the color from green to red.

(C) Laboratory values in secondary study group

| PS class | Group                | ΔHbA1c, 12 M (%) |             |             | ΔHbA1c, 3 M (%) |             |             | ΔHbA1c, 6 M (%) |             |             |
|----------|----------------------|------------------|-------------|-------------|-----------------|-------------|-------------|-----------------|-------------|-------------|
|          |                      | Mean             | 95%CI       |             | Mean            | 95%CI       |             | Mean            | 95%CI       |             |
|          |                      |                  | lower limit | upper limit |                 | lower limit | upper limit |                 | lower limit | upper limit |
| 1        | Increased-dose group | -1.04            | -2.09       | 0.01        | -1.30           | -2.66       | 0.06        | -1.58           | -2.93       | -0.24       |
|          | Drug-added group     | -0.49            | -0.79       | -0.19       | -0.75           | -0.98       | -0.52       | -0.71           | -1.05       | -0.37       |
|          | Drug-switched group  | -0.63            | -1.15       | -0.12       | -0.53           | -0.81       | -0.24       | -0.37           | -0.94       | 0.20        |
| 2        | Increased-dose group | -0.86            | -1.12       | -0.60       | -0.97           | -1.34       | -0.61       | -0.86           | -1.18       | -0.54       |
|          | Drug-added group     | -0.52            | -0.80       | -0.24       | -0.74           | -0.97       | -0.51       | -0.58           | -0.85       | -0.31       |
|          | Drug-switched group  | -0.50            | -0.70       | -0.30       | -0.65           | -0.75       | -0.55       | -0.85           | -1.34       | -0.36       |
| 3        | Increased-dose group | -0.90            | -1.30       | -0.50       | -0.81           | -1.12       | -0.50       | -0.86           | -1.27       | -0.45       |
|          | Drug-added group     | -0.70            | -1.15       | -0.26       | -0.88           | -1.32       | -0.44       | -0.97           | -1.49       | -0.45       |
|          | Drug-switched group  | 0.23             | -0.24       | 0.70        | -0.17           | -0.86       | 0.52        | -0.20           | -0.40       | 0.00        |
| 4        | Increased-dose group | -0.44            | -0.63       | -0.24       | -0.52           | -0.71       | -0.33       | -0.69           | -0.95       | -0.42       |
|          | Drug-added group     | -0.86            | -1.25       | -0.47       | -0.85           | -1.25       | -0.45       | -0.71           | -1.21       | -0.21       |
|          | Drug-switched group  | -0.65            | -2.51       | 1.21        |                 |             |             | -1.20           |             |             |
| 5        | Increased-dose group | -1.02            | -1.39       | -0.65       | -0.98           | -1.28       | -0.67       | -1.22           | -1.62       | -0.83       |
|          | Drug-added group     | -1.06            | -1.66       | -0.46       | -1.32           | -1.98       | -0.65       | -1.35           | -2.07       | -0.63       |
|          | Drug-switched group  | 0.50             |             |             | -0.30           |             |             | 0.00            |             |             |

The changes in values at 3 months (± 1 months) (3 M), 6 months (± 1 months) (6 M), and 12 months (± 3 months) (12 M) from baseline are indicated using delta (Δ). CI: confidence intervals, Hb: hemoglobin.

| PS class | Group                | ΔHDL-C (mg/dl) |             |             | ΔLDL-C (mg/dl) |             |             | ΔTotal-C (mg/dl) |             |             | ΔTG (mg/dl) |             |             |
|----------|----------------------|----------------|-------------|-------------|----------------|-------------|-------------|------------------|-------------|-------------|-------------|-------------|-------------|
|          |                      | Mean           | 95%CI       |             | Mean           | 95%CI       |             | Mean             | 95%CI       |             | Mean        | 95%CI       |             |
|          |                      |                | lower limit | upper limit |                | lower limit | upper limit |                  | lower limit | upper limit |             | lower limit | upper limit |
| 1        | Increased-dose group | -2.57          | -14.01      | 8.87        | -24.20         | -65.70      | 17.30       | -6.50            | -31.88      | 18.88       | -39.29      | -121.01     | 42.44       |
|          | Drug-added group     | -0.54          | -3.08       | 1.99        | -6.03          | -14.65      | 2.60        | -10.29           | -19.93      | -0.65       | 6.28        | -19.61      | 32.17       |
|          | Drug-switched group  | 2.67           | -7.60       | 12.93       | -24.50         | -35.28      | -13.72      | -13.33           | -30.47      | 3.80        | -15.67      | -72.81      | 41.48       |
| 2        | Increased-dose group | 3.24           | -1.05       | 7.54        | -3.36          | -16.15      | 9.44        | -18.00           | -44.62      | 8.62        | -16.73      | -47.98      | 14.52       |
|          | Drug-added group     | 0.09           | -1.91       | 2.09        | -8.23          | -19.28      | 2.81        | -6.00            | -16.53      | 4.53        | -38.68      | -72.57      | -4.79       |
|          | Drug-switched group  | 2.00           | -3.88       | 7.88        | -24.50         | -66.64      | 17.64       | -58.00           |             |             | -15.00      | -124.76     | 94.76       |
| 3        | Increased-dose group | -1.12          | -3.84       | 1.59        | -19.61         | -29.38      | -9.84       | -18.92           | -32.57      | -5.26       | -42.35      | -114.67     | 29.96       |
|          | Drug-added group     | 1.27           | -1.47       | 4.01        | -12.57         | -24.47      | -0.67       | -8.93            | -26.51      | 8.64        | -14.96      | -33.37      | 3.45        |
|          | Drug-switched group  | 4.30           | 3.71        | 4.89        | 0.80           | -4.69       | 6.29        | -11.00           | -11.00      | -11.00      | -109.00     | -222.68     | 4.68        |
| 4        | Increased-dose group | -0.85          | -3.72       | 2.01        | -7.66          | -14.56      | -0.77       | -11.89           | -23.36      | -0.42       | 2.42        | -24.53      | 29.37       |
|          | Drug-added group     | -0.85          | -3.95       | 2.25        | -10.55         | -22.80      | 1.70        | -16.95           | -31.54      | -2.37       | -34.73      | -91.16      | 21.70       |
|          | Drug-switched group  | -7.15          | -17.24      | 2.94        | 16.00          |             |             | -19.00           | -95.44      | 57.44       | 82.50       | 71.72       | 93.28       |
| 5        | Increased-dose group | 2.19           | -0.02       | 4.41        | -9.45          | -21.57      | 2.68        | -12.96           | -29.82      | 3.91        | -5.88       | -32.91      | 21.14       |
|          | Drug-added group     | 2.77           | -3.75       | 9.29        | -14.14         | -36.15      | 7.86        | 5.42             | -37.55      | 48.39       | 127.33      | -265.27     | 519.93      |
|          | Drug-switched group  | -14.00         |             |             | -90.00         |             |             | 59.00            |             |             | 1672.00     |             |             |

The changes in values at 12 months ( $\pm$  3 months) from baseline are indicated using delta ( $\Delta$ ). CI: confidence intervals, HDL-C: high-density lipoprotein cholesterol, LDL-C: low-density lipoprotein cholesterol, Total-C: total cholesterol, TG: triglyceride.

| PS class | Group                | ΔAST (U/L) |             |             | ΔALT (U/L) |             |             | ΔeGFR (ml/min/1.73m <sup>2</sup> ) |             |             |
|----------|----------------------|------------|-------------|-------------|------------|-------------|-------------|------------------------------------|-------------|-------------|
|          |                      | Mean       | 95%CI       |             | Mean       | 95%CI       |             | Mean                               | 95%CI       |             |
|          |                      |            | lower limit | upper limit |            | lower limit | upper limit |                                    | lower limit | upper limit |
| 1        | Increased-dose group | -14.00     | -43.22      | 15.22       | -12.88     | -29.43      | 3.68        | 2.44                               | -7.15       | 12.03       |
|          | Drug-added group     | -1.72      | -8.56       | 5.12        | -3.00      | -8.04       | 2.04        | -2.30                              | -4.70       | 0.11        |
|          | Drug-switched group  | -7.80      | -17.51      | 1.91        | -11.80     | -20.08      | -3.52       | -7.60                              | -13.35      | -1.85       |
| 2        | Increased-dose group | -11.09     | -28.95      | 6.77        | -8.55      | -23.88      | 6.79        | -2.83                              | -6.30       | 0.64        |
|          | Drug-added group     | -3.45      | -8.27       | 1.36        | -9.26      | -17.89      | -0.63       | -3.92                              | -7.07       | -0.76       |
|          | Drug-switched group  | -22.50     | -66.60      | 21.60       | -25.00     | -70.08      | 20.08       | -8.51                              | -36.95      | 19.93       |
| 3        | Increased-dose group | -8.76      | -16.98      | -0.54       | -10.14     | -20.23      | -0.05       | 2.28                               | -0.88       | 5.45        |
|          | Drug-added group     | -3.73      | -9.94       | 2.48        | -5.03      | -12.18      | 2.11        | 1.04                               | -7.23       | 9.31        |
|          | Drug-switched group  | -3.00      | -6.39       | 0.39        | -7.00      | -11.08      | -2.92       | 8.07                               | 3.41        | 12.72       |
| 4        | Increased-dose group | 0.19       | -3.92       | 4.30        | 1.76       | -5.62       | 9.14        | 0.23                               | -3.39       | 3.84        |
|          | Drug-added group     | -2.90      | -7.15       | 1.35        | -5.90      | -14.00      | 2.20        | -5.41                              | -9.25       | -1.57       |
|          | Drug-switched group  | -4.50      | -11.36      | 2.36        | -8.00      | -11.92      | -4.08       | -8.28                              | -23.02      | 6.47        |
| 5        | Increased-dose group | 3.21       | -1.77       | 8.18        | 3.51       | -6.85       | 13.88       | -1.97                              | -5.20       | 1.26        |
|          | Drug-added group     | -0.78      | -13.46      | 11.91       | -6.72      | -19.41      | 5.96        | -4.37                              | -9.79       | 1.04        |
|          | Drug-switched group  | 74.00      |             |             | 51.00      |             |             | 10.20                              |             |             |

The changes in values at 12 months ( $\pm$  3 months) from baseline are indicated using delta ( $\Delta$ ). AST: aspartate aminotransferase, ALT: alanine aminotransferase, CI: confidence intervals, eGFR: estimated glomerular filtration.

(D) Percentage of patients achieving target HbA1c levels, hospitalization, and incidence rate of hypoglycemia in secondary study group

| PS class | Group                | N  | HbA1c <6.5% (%) |             |             | HbA1c <7.0% (%) |             |             | Hospitalization (%) |             |             | Incidence rate of hypoglycemia (%) |             |             |
|----------|----------------------|----|-----------------|-------------|-------------|-----------------|-------------|-------------|---------------------|-------------|-------------|------------------------------------|-------------|-------------|
|          |                      |    | %               | 95%CI       |             | %               | 95%CI       |             | %                   | 95%CI       |             | %                                  | 95%CI       |             |
|          |                      |    |                 | lower limit | upper limit |                 | lower limit | upper limit |                     | lower limit | upper limit |                                    | lower limit | upper limit |
| 1        | Increased-dose group | 8  | 37.50%          | 8.52%       | 75.51%      | 75.00%          | 34.91%      | 96.81%      | 112.50%             | 51.44%      | 213.56%     | 0.00%                              |             | 36.94%      |
|          | Drug-added group     | 44 | 36.36%          | 22.41%      | 52.23%      | 61.36%          | 45.50%      | 75.64%      | 11.36%              | 3.69%       | 26.52%      | 0.00%                              |             | 8.04%       |
|          | Drug-switched group  | 6  | 83.33%          | 35.88%      | 99.58%      | 83.33%          | 35.88%      | 99.58%      | 133.33%             | 57.56%      | 262.72%     | 0.00%                              |             | 45.93%      |
| 2        | Increased-dose group | 12 | 33.33%          | 9.92%       | 65.11%      | 100.00%         | 73.54%      |             | 16.67%              | 2.02%       | 60.21%      | 0.00%                              |             | 26.46%      |
|          | Drug-added group     | 44 | 25.00%          | 13.19%      | 40.34%      | 61.36%          | 45.50%      | 75.64%      | 27.27%              | 14.09%      | 47.64%      | 0.00%                              |             | 8.04%       |
|          | Drug-switched group  | 2  | 0.00%           |             | 84.19%      | 0.00%           |             | 84.19%      | 0.00%               |             | 184.44%     | 0.00%                              |             | 84.19%      |
| 3        | Increased-dose group | 23 | 21.74%          | 7.46%       | 43.70%      | 52.17%          | 30.59%      | 73.18%      | 26.09%              | 9.57%       | 56.78%      | 0.00%                              |             | 14.82%      |
|          | Drug-added group     | 32 | 31.25%          | 16.12%      | 50.01%      | 62.50%          | 43.69%      | 78.90%      | 12.50%              | 3.41%       | 32.00%      | 0.00%                              |             | 10.89%      |
|          | Drug-switched group  | 3  | 0.00%           |             | 70.76%      | 0.00%           |             | 70.76%      | 0.00%               |             | 122.96%     | 0.00%                              |             | 70.76%      |
| 4        | Increased-dose group | 24 | 33.33%          | 15.63%      | 55.32%      | 54.17%          | 32.82%      | 74.45%      | 0.00%               |             | 15.37%      | 0.00%                              |             | 14.25%      |
|          | Drug-added group     | 32 | 37.50%          | 21.10%      | 56.31%      | 71.88%          | 53.25%      | 86.25%      | 15.63%              | 5.07%       | 36.46%      | 0.00%                              |             | 10.89%      |
|          | Drug-switched group  | 2  | 0.00%           |             | 84.19%      | 0.00%           |             | 84.19%      | 0.00%               |             | 184.44%     | 0.00%                              |             | 84.19%      |
| 5        | Increased-dose group | 39 | 28.21%          | 15.00%      | 44.87%      | 64.10%          | 47.18%      | 78.80%      | 7.69%               | 1.59%       | 22.48%      | 0.00%                              |             | 9.03%       |
|          | Drug-added group     | 19 | 42.11%          | 20.25%      | 66.50%      | 68.42%          | 43.45%      | 87.42%      | 10.53%              | 1.27%       | 38.02%      | 0.00%                              |             | 17.65%      |
|          | Drug-switched group  | 1  | 0.00%           |             | 97.50%      | 0.00%           |             | 97.50%      | 0.00%               |             | 368.89%     | 0.00%                              |             | 97.50%      |

CI: confidence intervals. Color indicates the relative order in the column as the following sequence: red is the highest; green is the lowest; and intermediate color is the in-between with the ranking corresponding to gradational change of the color from green to red.



Table S2 The changes in eGFR values at 12 months ( $\pm 3$  months) from baseline in each class of baseline eGFR value in primary study group

|                       | Increased-dose group |             |             | Drug-added group |             |             | Drug-switched group |             |             |
|-----------------------|----------------------|-------------|-------------|------------------|-------------|-------------|---------------------|-------------|-------------|
|                       | Mean                 | 95%CI1      |             | Mean             | 95%CI       |             | Mean                | 95%CI       |             |
|                       |                      | lower limit | upper limit |                  | lower limit | upper limit |                     | lower limit | upper limit |
| eGFR(0) <45           | -0.832               | -121.046    | 119.382     | -2.076           | -4.970      | 0.817       | -6.350              | -23.405     | 10.704      |
| 45 $\leq$ eGFR(0) <60 | 0.605                | 0.139       | 1.070       | 0.540            | -3.319      | 4.399       | 3.967               | -11.953     | 19.888      |
| 60 $\leq$ eGFR(0) <90 | -0.483               | -1.610      | 0.644       | -3.703           | -5.586      | -1.820      | -4.230              | -42.995     | 34.534      |
| eGFR(0) $\geq$ 90     | -3.437               | -8.677      | 1.804       | -10.578          | -29.182     | 8.025       | -6.519              | -33.173     | 20.136      |

CI: confidence intervals, eGFR: estimated glomerular filtration. eGFR(0): eGFR value (ml/min/1.73m<sup>2</sup>) during the baseline. Orange color indicates that both the values of 95% CI upper limit and lower limit are positive, and blue color indicates that both are negative.
